# Supplementary material for: Molecular Recognition by Pillar[5]arenes: Evidence for Simultaneous Electrostatic and Hydrophobic Interactions
Source: MDPI journal article supplement (doi:10.3390/pharmaceutics14010060), 2021-12-28
Supplement: s1 [file s1]

# Supplementary Materials: Molecular Recognition by Pillar[5]arenes: Evidence for Simultaneous Electrostatic and Hydrophobic Interactions

B. Gómez-González, L. García-Río, N. Basilio, J. C. Mejuto and J. Simal-Gandara

Figures S1-S4 show each titration of alkylsulfonates fitted by the “one set of binding sites” model.

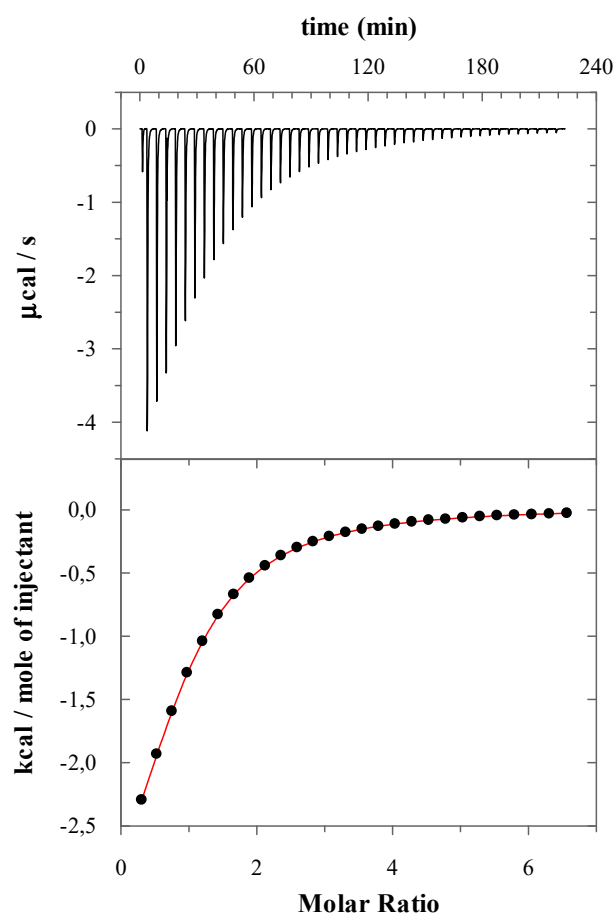

**Figure S1.** Microcalorimetric titration of propylsulfonate (G) with pillar[5]arene (H) in water at 25°C. Top: Raw data for the 28 sequential injections (10  $\mu$ L per injection) of a solution of G (0.5mM) into a solution of H (0.04mM). Bottom: “Net” heat effects obtained by subtracting the dilution heat from the reaction heat, which was fitted by computer simulation using the “one set of sites” binding model.

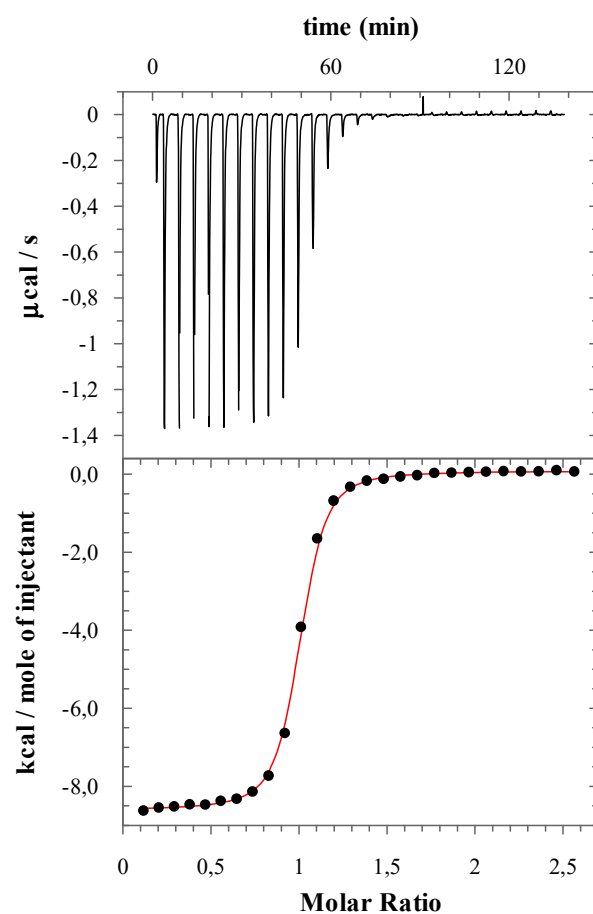

**Figure S2.** Microcalorimetric titration of pentylsulfonate (G) with pillar[5]arene (H) in water at 25°C. Top: Raw data for the 28 sequential injections (10  $\mu\text{L}$  per injection) of a solution of G (0.5mM) into a solution of H (0.04mM). Bottom: "Net" heat effects obtained by subtracting the dilution heat from the reaction heat, which was fitted by computer simulation using the "one set of sites" binding model.

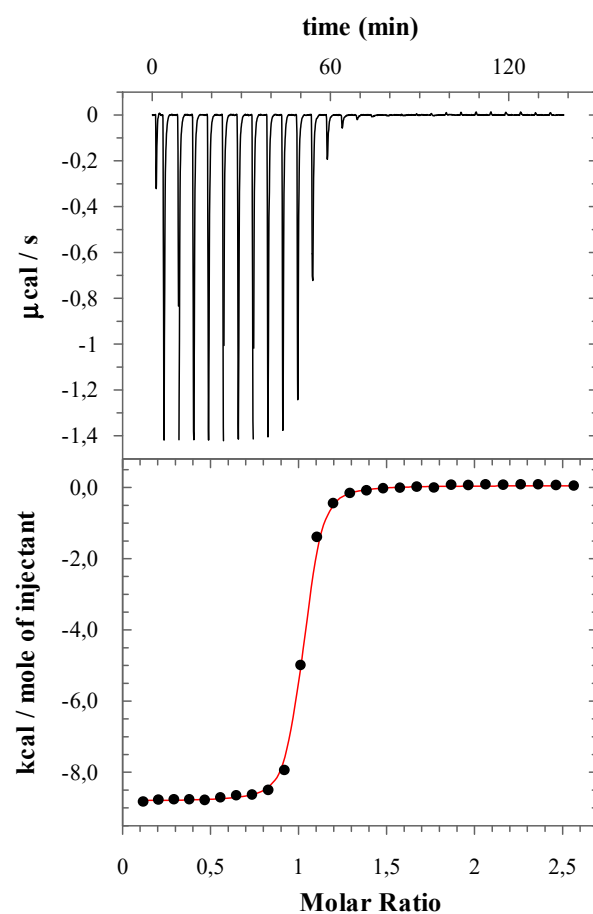

**Figure S3.** Microcalorimetric titration of hexylsulfonate (G) with pillar[5]arene (H) in water at 25°C. Top: Raw data for the 28 sequential injections (10  $\mu\text{L}$  per injection) of a solution of G (0.5mM) into a solution of H (0.04mM). Bottom: "Net" heat effects obtained by subtracting the dilution heat from the reaction heat, which was fitted by computer simulation using the "one set of sites" binding model.

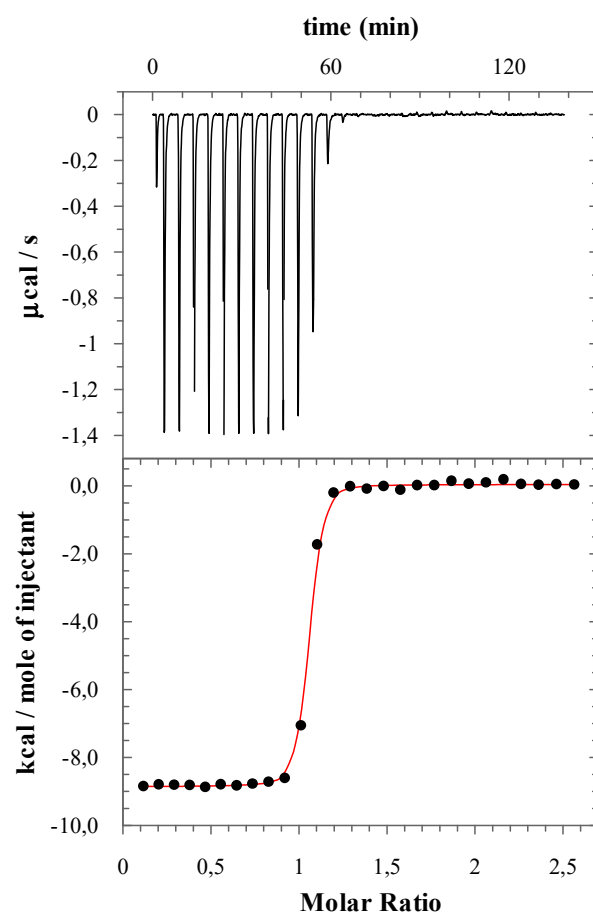

**Figure S4.** Microcalorimetric titration of octylsulfonate (G) with pillar[5]arene (H) in water at 25°C. Top: Raw data for the 28 sequential injections (10  $\mu\text{L}$  per injection) of a solution of G (0.5mM) into a solution of H (0.04mM). Bottom: "Net" heat effects obtained by subtracting the dilution heat from the reaction heat, which was fitted by computer simulation using the "one set of sites" binding model.
